# Supplementary material for: Ethnicity, migration, and weight misperception: a Born in Bradford study
Source: bioRxiv or medRxiv preprint supplement (doi:10.1101/2021.07.07.21259906), 2021-07-09

Supplementary Figure 1. Directed acyclic graph (DAG) drawn to depict the relationship between ethnicity and birth country with covariates and misperception of body weight.

**Birth country    misperception**

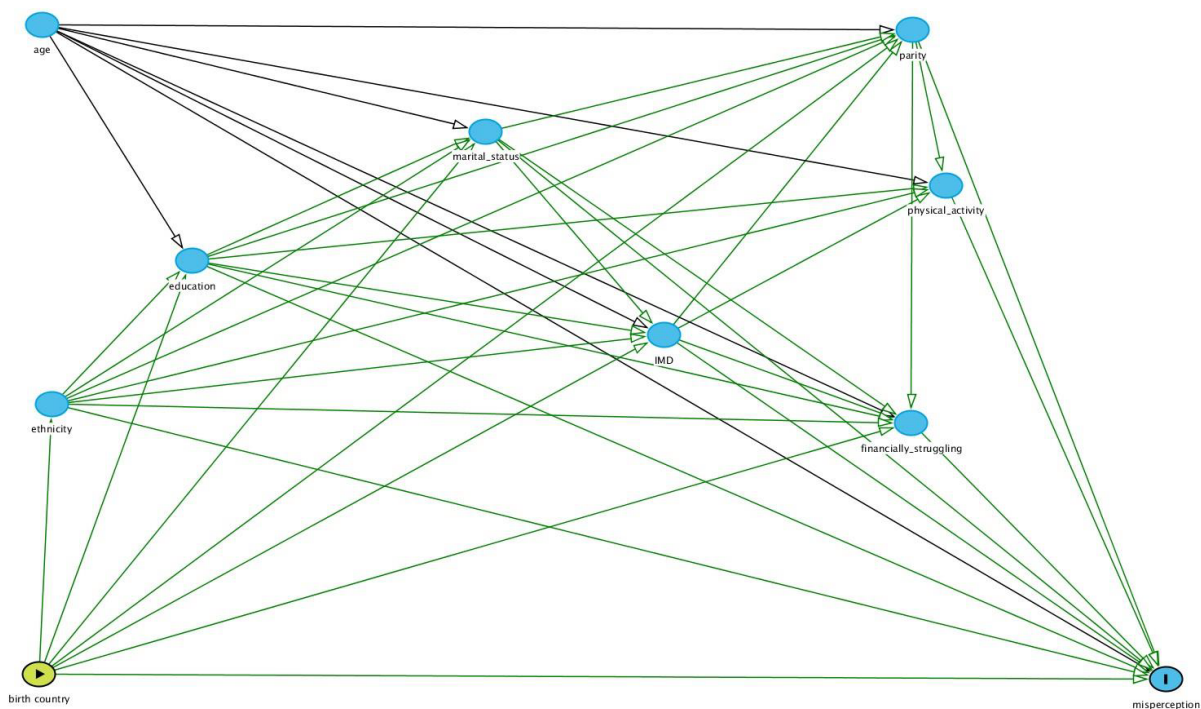

**Ethnicity    misperception**

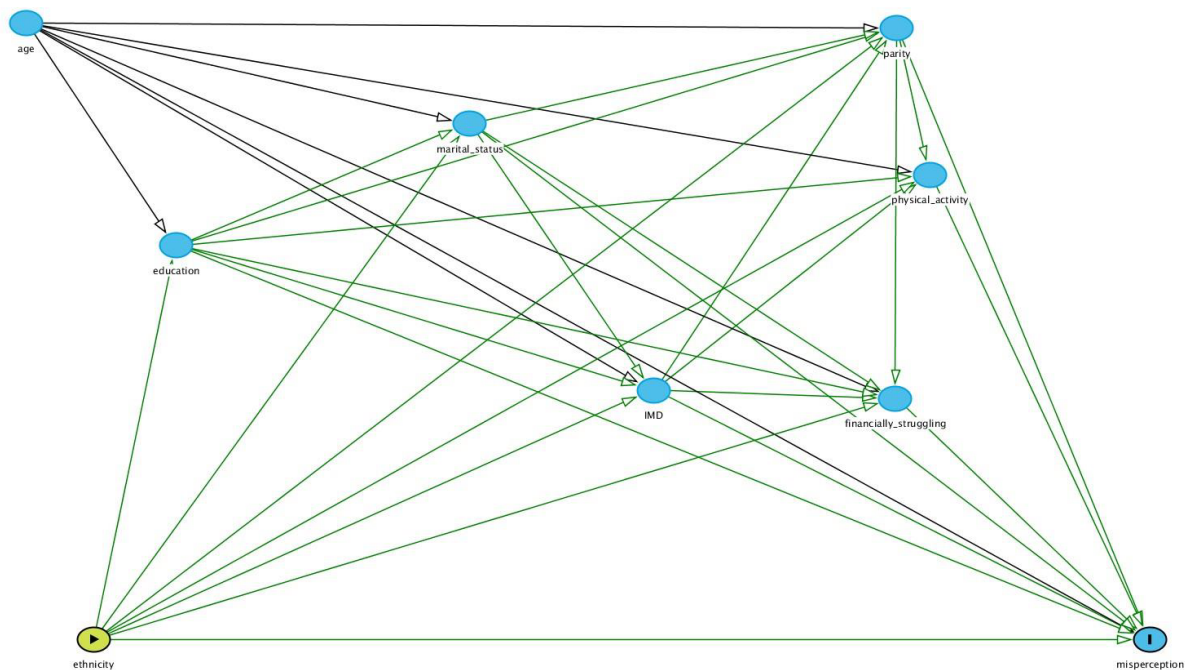

Supplement: Supplementary file [file media-1.pdf]
