# Supplementary material for: Ethnicity, migration, and weight misperception: a Born in Bradford study
Source: bioRxiv or medRxiv preprint supplement (doi:10.1101/2021.07.07.21259906), 2021-07-09

Supplementary figure 2. Accuracy of body weight perception using the figure rating scale (FRS) and perceived weight status question (PWQ) among English-speaking women by (a) ethnicity and (b) country of birth among Pakistani-origin women.

a.

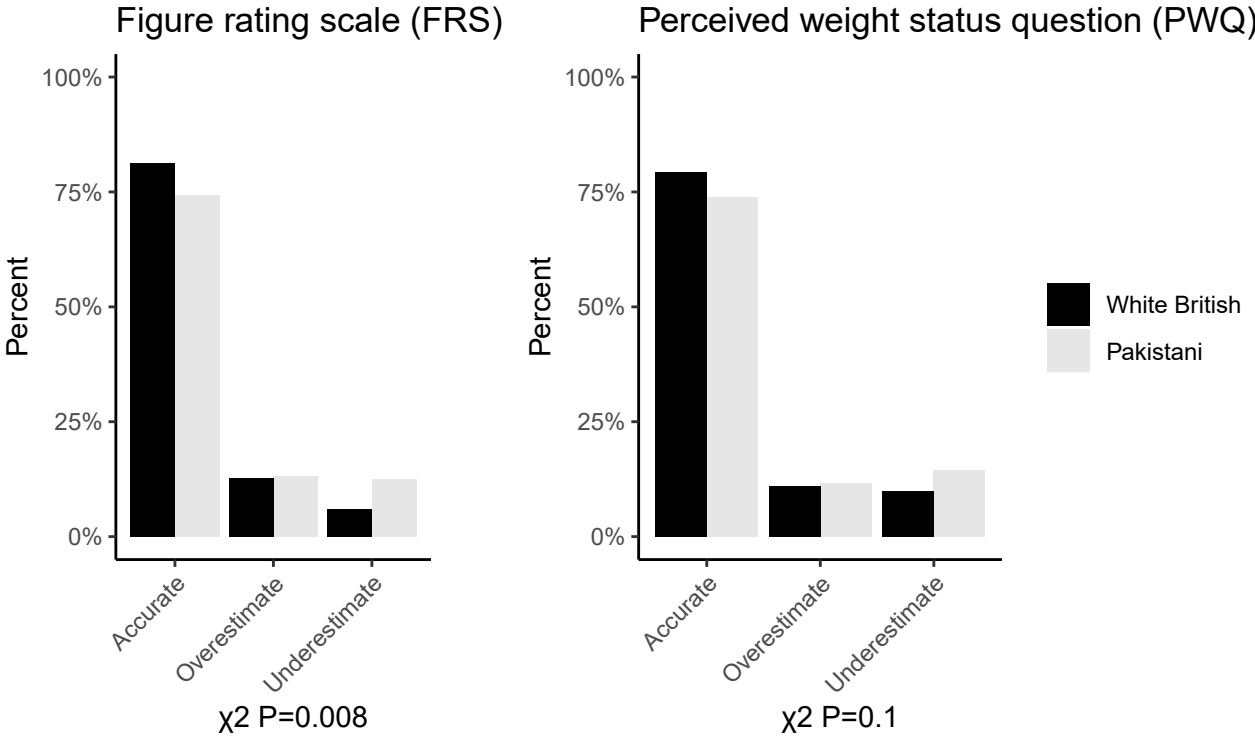

b.

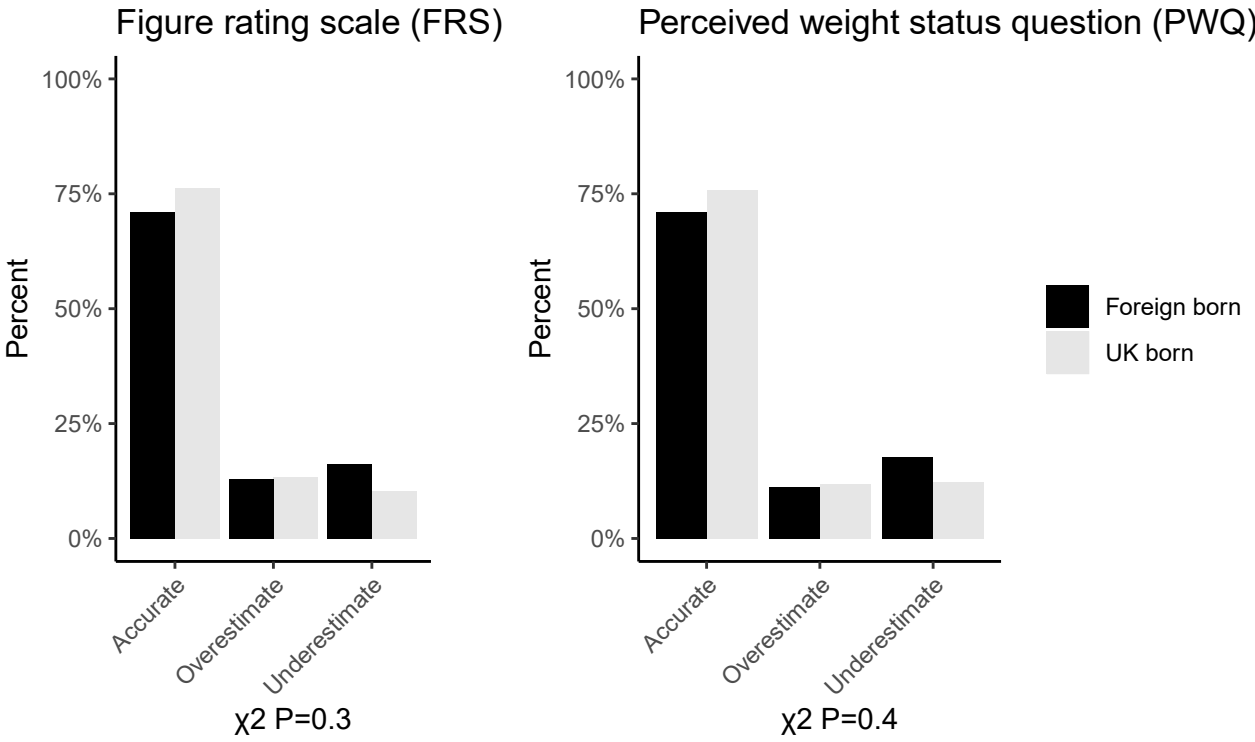

Supplement: Supplementary file [file media-2.pdf]
